# Supplementary material for: A single amino acid polymorphism in a conserved effector of the multihost blast fungus pathogen expands host-target binding spectrum
Source: PLoS Pathog. 2021 Nov 10;17(11):e1009957. doi: 10.1371/journal.ppat.1009957 (PMC8608293; doi:10.1371/journal.ppat.1009957)
Supplement: S1 Table — (XLSX) [file ppat.1009957.s001.xlsx]

## Sheet: Isolate Information
Isolate ID	Synonym ID	Host	Year	Location	Accession no.	Reference	busco-completeness *
70-15		Laboratory strain	NA	NA	SAMN02953596	Dean et al., 2005; [1]	98.2
87-120		Oryza sativa	NA	NA	SAMN08377452	Gladieux et al., 2018 [2]	97.5
98-06		Oryza sativa	NA	Jiangsu, China	SAMN03010511	Dong et al., 2015 [3]	98
Arcadia		Setaria viridis	1998	Lexington, KY, USA	SAMN08009540	Farman et al., 2017 [4]; Pieck et al., 2016 [5]	96.4
B157		Oryza sativa	1989	India	SAMN03329169	Gowda et al., 2015 [6]; Kachroo et al., 1994 [7]	96.2
B2		Triticum aestivum	2011	Bolivia	SAMN05580113	Pieck et al., 2016 [5]	97.3
B51		Eleusine indica	2012	Quirusillas, Bolivia	SAMN08009542	Farman et al., 2017 [4]; Pieck et al., 2016 [5]	97.5
B71		Triticum aestivum	2012	Bolivia	SAMN06076154	Peng et al., 2019 [8]	98
Bd8401		Brachiaria distachya	1984	Philippines	SAMN08009543	Gladieux et al., 2018 [2]	98
BdBar16-1	BdBar	Triticum aestivum	2016	Barisal, Bangladesh	SAMN04940126	Malaker et al., 2016 [9]	90.9
BdJes16-1	BdJes	Triticum aestivum	2016	Jessore, Bangladesh	SAMN04942531	Malaker et al., 2016 [9]	94
BdMeh16-1	BdMeh	Triticum aestivum	2016	Mehepur, Bangladesh	SAMN04942534	Malaker et al., 2016 [9]	97.7
Bm88324		Brachiaria mutica	1988	Philippines	SAMN08009544	Gladieux et al., 2018 [2]	98.2
Br130		Triticum aestivum	1990	Mato Grosso do Sul, Brazil	SAMN08009547	Farman et al., 2017 [4]	94.6
BR29	BR0029	Digitaria sanguinalis	1989	Brazil	NA; available on GEMO	Chiapello et al., 2015 [10]	98.2
BR32	BR0032	Triticum aestivum	1991	Brazil	SAMEA4708260	Chiapello et al., 2015 [10], Islam et al., 2016 [11], Langner et al., 2021 [12]	98
br48		Triticum aestivum	1990	Mato Grosso do Sul, Brazil	NA	Yoshida et al., 2016 [13]	96.5
br58		Avena sativa	1990	Parana, Brazil	NA	Yoshida et al., 2016 [13]	96.8
Br62		Eleusine indica	1991	Brazil	SAMEA4029901	Soanes et al., 2017a [14]; Islam et al., 2016 [11]	97.7
Br7		Triticum aestivum	1990	Parana, Brazil	SAMN08009545	Farman et al., 2017 [4]; Pieck et al., 2016 [5]	97.6
Br80		Triticum aestivum	1991	Brazil	SAMN08009546	Farman et al., 2017 [4]; Pieck et al., 2016 [5]	97.9
BTBa_B1	BTBa-B1	Triticum aestivum	2016	Gazipur, Bangladesh	SAMEA104190806	Soanes et al., 2017b [15]	97.8
BTBa_B2	BTBa-B2	Triticum aestivum	2016	Gazipur, Bangladesh	SAMEA104190807	Soanes et al., 2017b [15]	97.7
BTGP_1b	BTGP-1(b)	Triticum aestivum	2017	Gangni, Meherpur, Bangladesh	SAMEA104190809	Soanes et al., 2017b [15]	97.9
BTGP_6e	BTGP-6(e)	Triticum aestivum	2017	Gangni, Meherpur, Bangladesh	SAMEA104190808	Soanes et al., 2017b [15]	98
BTGP_6f	BTGP-6(f)	Triticum aestivum	2017	Gangni, Meherpur, Bangladesh	SAMEA104190810	Soanes et al., 2017b [15]	97.9
BTGP_6g	BTGP-6(g)	Triticum aestivum	2017	Gangni, Meherpur, Bangladesh	SAMEA104190811	Soanes et al., 2017b [15]	97.9
BTGP_6h	BTGP-6(h)	Triticum aestivum	2017	Gangni, Meherpur, Bangladesh	SAMEA104190812	Soanes et al., 2017b [15]	97.8
BTJP_4_1	BTJP-4(1)	Triticum aestivum	2016	Jhenaidah, Bangladesh	SAMEA104190813	Soanes et al., 2017b [15]	97.9
BTJP4_11	BTJP-4(11)	Triticum aestivum	2016	Jhenaidah, Bangladesh	SAMEA104190817	Soanes et al., 2017b [15]	97.9
BTJP4_12	BTJP-4(12)	Triticum aestivum	2016	Jhenaidah, Bangladesh	SAMEA104190818	Soanes et al., 2017b [15]	97.9
BTJP4_16	BTJP-4(16)	Triticum aestivum	2016	Jhenaidah, Bangladesh	SAMEA104190819	Soanes et al., 2017b [15]	97.8
BTJP4_18	BTJP-4(18)	Triticum aestivum	2016	Jhenaidah, Bangladesh	SAMEA104190820	Soanes et al., 2017b [15]	97.9
BTJP4_3	BTJP-4(3)	Triticum aestivum	2016	Jhenaidah, Bangladesh	SAMEA104190814	Soanes et al., 2017b [15]	97.8
BTJP4_5	BTJP-4(5)	Triticum aestivum	2016	Jhenaidah, Bangladesh	SAMEA104190815	Soanes et al., 2017b [15]	97.8
BTJP4_6	BTJP-4(6)	Triticum aestivum	2016	Jhenaidah, Bangladesh	SAMEA104190816	Soanes et al., 2017b [15]	97.5
BTMP_S_13_1	BTMP-S-13(1)	Triticum aestivum	2016	Meherpur, Bangladesh	SAMEA104190821	Soanes et al., 2017b [15]	97.9
BTMP_S_13_2	BTMP-S-13(2)	Triticum aestivum	2016	Meherpur, Bangladesh	SAMEA104190822	Soanes et al., 2017b [15]	97.8
BTTrp_5	BTTrp-5	Panicum repens	2016	Gazipur, Bangladesh	SAMEA104190823	Soanes et al., 2017b [15]	98
BTTrp_6	BTTrp-6	Panicum repens	2016	Gazipur, Bangladesh	SAMEA104190824	Soanes et al., 2017b [15]	98.1
CD156	CD0156	Eleusine indica	1989	Ferkessedougou, Ivory Coast	SAMEA4708261	Langner et al., 2021 [12], Chiapello et al., 2015 [10]	98
CHRF		Lolium perenne	1996	Silver Spring, MD, USA	SAMN08009548	Pieck et al., 2016 [5]	97.8
CHW		Lolium perenne	1996	Annapolis, MD, USA	SAMN08009549	Pieck et al., 2016 [5]	97.7
Dig41		Digitaria sanguinalis	1990	Hyogo, Japan	NA	Yoshida et al., 2016 [13]	88.7
DS0505		Digitaria sanguinalis	2005	Zhejiang, China	SAMN04299554	Zhong et al., 2016 [16]	97.9
DS9461		Digitaria sanguinalis	1994	Fujian, China	SAMN04318446	Zhong et al., 2016 [16]	97.9
DsLIZ		Digitaria sanguinalis	2000	Lexington, KY, USA	SAMN08009550	Pieck et al., 2016 [5]	96.8
EI9411		Eleusine indica	1994	Fujian, China	SAMN04318447	Zhong et al., 2016 [16]	97.8
EI9604		Eleusine indica	1996	Zhejiang, China	SAMN04318448	Zhong et al., 2016 [16]	97.8
FH		Lolium perenne	1997	Hagerstown, MD, USA	SAMN08009551	Farman et al., 2017 [4]; Pieck et al., 2016 [5]	96.5
FJ81278		Oryza sativa	NA	China	SAMN06050152	Bao et al., 2017 [17]	98
FR13	FR0013	Oryza sativa	1988	France	SAMEA4708258	Langner et al., 2021 [12], Chiapello et al., 2015 [10]	98.1
G17	K76-79	Eragrostis curvula	1976	Japan	SAMN08009553	Soanes et al., 2017a [14]; Islam et al., 2016 [11]	97.4
G22	WGG-FA40	Eleusine coracana	1976	Japan	SAMN08009554	Gladieux et al., 2018 [2]	97.7
gfsi	GFSI1-7-2, GFSI	Setaria italica	1977	Gifu, Japan	NA	Yoshida et al., 2016 [13]	97.5
GG11		Lolium perenne	1997	Lexington, KY, USA	SAMN08009555	Farman et al., 2017 [4]	97.9
GrF52		Setaria viridis	2001	Lexington, KY, USA	SAMN08009556	Gladieux et al., 2018 [2]	97.9
Guy11	GY11, GY0011	Oryza sativa	1988	French Guyana	SAMN06050153	Chiapello et al., 2015 [10], Islam et al., 2016 [11]	97.9
HN19311		Oryza sativa	NA	Hunan, China	SAMN02216973	Chen et al., 2013 [18]	97.9
HO		Lolium perenne	1996	Richmond, PA, USA	SAMN08009558	Farman et al., 2017 [4]	98
IA1	ARB114	Oryza sativa	2009	Arkansas, USA	SAMN08009559	Pieck et al., 2016 [5]	98
IB33		Oryza sativa	NA	Texas, USA	SAMN08009560	Gladieux et al., 2018 [2]	97.8
IB49	ZN61	Oryza sativa	1992	Arkansas, USA	SAMN08009561	Pieck et al., 2016 [5]	98
IC17	ZN57	Oryza sativa	1992	Arkansas, USA	SAMN08009562	Pieck et al., 2016 [5]	97.8
IE1K	TM2	Oryza sativa	2003	Arkansas, USA	SAMN08009563	Pieck et al., 2016 [5]	98
ina168		Oryza sativa	1958	Aichi, Japan	NA	Yoshida et al., 2016 [13], Inoue et al., 2017 [19]	97.3
KJ201		Oryza sativa		Korea	SAMN02730190		96.4
LpKY97	LpKY97-1	Lolium perenne	1997	Lexington, KY, USA	SAMN08009564	Farman et al., 2017 [4]; Pieck et al., 2016 [5]	97.7
MG01		Oryza sativa	2012	India	SAMN02397294	Gowda et al., 2015 [4]; Kachroo et al., 1994 [5]	96
ML33		Oryza sativa	1995	Mali	SAMN08009565	Gladieux et al., 2018 [2]	98
MZ5-1-6		Eleusine coracana	1976	Myazaki, Japan	SAMN10491321	Gómez Luciano et al., 2019 [20], Inoue et al., 2017 [19]	98.1
P131		Oryza sativa	2012	India	SAMN02981399	Xue et al., 2012 [21]	97.8
P28	P-0028	Bomus tectorum	2014	Paraguay	SAMN05864041	Pieck et al., 2016 [5]	97.9
P29	P-0029	Bomus tectorum	2014	Paraguay	SAMN05898532	Pieck et al., 2016 [5]	97.1
P3		Triticum durum	2012	Canindeyu, Paraguay	SAMN08009568	Pieck et al., 2016 [5]	98
Pg1213-22		Festuca arundinaceum	1999/2000	Georgia, USA	SAMN08009569	Pieck et al., 2016 [5]	97.8
PgKY	PgKY4OV2.1	Lolium perenne	2000	Lexington, KY, USA	SAMEA4029903	Soanes et al., 2017a [14]; Islam et al., 2016 [11]	97.5
PGPA	PgPA18C-02, PgPA	Lolium perenne	1998	Pennsylvania, USA	SAMEA4029904	Soanes et al., 2017a [14]; Islam et al., 2016 [11]	97.7
PH14	PH0014, PH0014-rn	Oryza sativa	NA	Philippines	NA; available on GEMO	Chiapello et al., 2015 [10], Islam et al., 2016 [11]	97.7
PH42		Eleusine coracana	1983	Philippines	SAMN08009570	Pieck et al., 2016 [5]	95.8
PL2-1		Lolium multiflorum	2002	Pulaski Co., KY, USA	SAMN08009571	Farman et al., 2017 [4]	97.7
PL3-1		Lolium multiflorum	2002	Pulaski Co., KY, USA	SAMN08009572	Farman et al., 2017 [4]; Pieck et al., 2016 [5]	97.5
PM1		Pennisetum americanum	1990	Georgia, USA	SAMN08377453	Gladieux et al., 2018 [2]	96.9
PY0925		Triticum aestivum	2009	Predizes, Brazil	SAMEA4029894	Soanes et al., 2017a [14]; Islam et al., 2016 [11]	97.8
PY36.1	PY36-1	Triticum aestivum	2007	Brasilia, Brazil	SAMEA4029897	Soanes et al., 2017a [14]; Islam et al., 2016 [11]	97.6
PY5003	PY05003	Triticum aestivum	2005	Londrina, Brazil	SAMEA4029888	Soanes et al., 2017a [14]; Islam et al., 2016 [11]	90.2
PY5010	PY05010	Triticum aestivum	2005	Londrina, Brazil	SAMEA4029898	Soanes et al., 2017a [14]; Islam et al., 2016 [11]	97.7
PY5033	PY05033	Triticum aestivum	2005	Londrina, Brazil	SAMEA4029889	Soanes et al., 2017a [14]; Islam et al., 2016 [11]	97.5
PY6017	PY06017	Triticum aestivum	2006	Coromandel, Brazil	SAMEA4029890	Soanes et al., 2017a [14]; Islam et al., 2016 [11]	97.6
PY6045	PY06045	Triticum aestivum	2006	Goiânia, Brazil	SAMEA4029900	Soanes et al., 2017a [14]; Islam et al., 2016 [11]	97.8
PY86.1	PY86-1	Triticum aestivum	2008	Cascavel, Brazil	SAMEA4029893	Soanes et al., 2017a [14]; Islam et al., 2016 [11]	97.6
RMg-DI		Oryza sativa	NA	Madhubani,Bihar,India	SAMN05425585	Kumar et al., 2017 [22]	94.3
SSFL02		Stenotaphrum secundatum	2002	Disney World, FL, USA	SAMN08009573	Pieck et al., 2016 [5]	97.5
SSFL14-3		Stenotaphrum secundatum	2014	New Smyrna, FL, USA	SAMN08009574	Gladieux et al., 2018 [2]	97.8
SV9610-1		Setaria viridis	1996	Zhejiang, China	SAMN04318449	Zhong et al., 2016 [16]	98.2
SV9623-1		Setaria viridis	1996	Zhejiang, China	SAMN04318450	Zhong et al., 2016 [16]	98
T25		Triticum aestivum	1988	Parana, Brazil	SAMN08009575	Farman et al., 2017 [4]; Pieck et al., 2016 [5]	97.6
TF05-1		Festuca arundinaceum	2005	Lexington, KY, USA	SAMN08009576	Gladieux et al., 2018 [2]	97.9
TH12	TH0012, TH0012-rn	Hordeum vulgare	NA	Thailand	NA; available on GEMO	Chiapello et al., 2015 [10], Islam et al., 2016 [11]	97.7
TH16	TH0016	Hordeum vulgare	NA	Thailand	NA; available on GEMO	Chiapello et al., 2015 [10], Islam et al., 2016 [11]	97.9
US71	US0071	Setaria sp.	NA	USA	SAMEA4708259	Chiapello et al., 2015 [10], Islam et al., 2016 [11], Langner et al., 2021 [12]	98.1
v86010		Oryza sativa	NA	Philippines	SAMN06392751	Zhu et al., 2017 [23]	96.4
VO107		Digitaria sanguinalis	1981	Texas, USA	SAMN08009577	Gladieux et al., 2018 [2]	84.4
WBKY11	WBKY11-15	Triticum aestivum	2011	Lexington, KY	SAMN08009578	Farman et al., 2017 [4]; Pieck et al., 2016 [5]	97.9
WHTQ		Triticum aestivum	NA	Brazil	SAMN08009580	Farman et al., 2017 [4]	92.9
Y34		Oryza sativa	1982	Yunnan, China	SAMN02981398	Xue et al., 2012 [21]	97.9
z2-1		Eleusine coracana	1977	Kagawa, Japan	NA	Yoshida et al., 2016 [13]	97
							*Sordariomycota database
References**
1	Dean RA, Talbot NJ, Ebbole DJ, Farman ML, Mitchell TK, Orbach MJ, et al. The genome sequence of the rice blast fungus Magnaporthe grisea. Nature. 2005 Apr;434(7036):980–6.
2	Gladieux P, Condon B, Ravel S, Soanes D, Maciel JLN, Nhani A, et al. Gene Flow between Divergent Cereal- and Grass-Specific Lineages of the Rice Blast Fungus Magnaporthe oryzae. Taylor JW, editor. mBio. 2018 Feb 27;9(1):e01219-17.
3	Dong Y, Li Y, Zhao M, Jing M, Liu X, Liu M, et al. Global Genome and Transcriptome Analyses of Magnaporthe oryzae Epidemic Isolate 98-06 Uncover Novel Effectors and Pathogenicity-Related Genes, Revealing Gene Gain and Lose Dynamics in Genome Evolution. PLOS Pathog. 2015 Apr 2;11(4):e1004801.
4	Farman M, Peterson G, Chen L, Starnes J, Valent B, Bachi P, et al. The Lolium Pathotype of Magnaporthe oryzae Recovered from a Single Blasted Wheat Plant in the United States. Plant Dis. 2017 May 1;101(5):684–92.
5	Pieck ML, Ruck A, Farman ML, Peterson GL, Stack JP, Valent B, et al. Genomics-Based Marker Discovery and Diagnostic Assay Development for Wheat Blast. Plant Dis. 2016 Sep 19;101(1):103–9.
6	Gowda M, Shirke MD, Mahesh HB, Chandarana P, Rajamani A, Chattoo BB. Genome analysis of rice-blast fungus Magnaporthe oryzae field isolates from southern India. Genomics Data. 2015 Jun 20;5:284–91.
7	Kachroo P, Leong SA, Chattoo BB. Pot2, an inverted repeat transposon from the rice blast fungus Magnaporthe grisea. Mol Gen Genet MGG. 1994 May 1;245(3):339–48.
8	Peng Z, Oliveira-Garcia E, Lin G, Hu Y, Dalby M, Migeon P, et al. Effector gene reshuffling involves dispensable mini-chromosomes in the wheat blast fungus. Lin X, editor. PLOS Genet. 2019 Sep 12;15(9):e1008272.
9	Malaker PK, Barma NCD, Tiwari TP, Collis WJ, Duveiller E, Singh PK, et al. First Report of Wheat Blast Caused by Magnaporthe oryzae Pathotype triticum in Bangladesh. Plant Dis. 2016 Jun 6;100(11):2330–2330.
10	Chiapello H, Mallet L, Guérin C, Aguileta G, Amselem J, Kroj T, et al. Deciphering Genome Content and Evolutionary Relationships of Isolates from the Fungus Magnaporthe oryzae Attacking Different Host Plants. Genome Biol Evol. 2015 Oct;7(10):2896–912.
11	Islam MT, Croll D, Gladieux P, Soanes DM, Persoons A, Bhattacharjee P, et al. Emergence of wheat blast in Bangladesh was caused by a South American lineage of Magnaporthe oryzae. BMC Biol. 2016 Dec;14(1):84.
12	Langner T, Harant A, Gomez-Luciano LB, Shrestha RK, Malmgren A, Latorre SM, et al. Genomic rearrangements generate hypervariable mini-chromosomes in host-specific isolates of the blast fungus. PLOS Genet. 2021 Feb 16;17(2):e1009386.
13	Yoshida K, Saunders DGO, Mitsuoka C, Natsume S, Kosugi S, Saitoh H, et al. Host specialization of the blast fungus Magnaporthe oryzae is associated with dynamic gain and loss of genes linked to transposable elements. BMC Genomics. 2016 Dec;17(1):370.
14	Darren Soanes, Lauren S. Ryder, M. Tofazzal Islam, Nicholas J. Talbot. Genome assemblies of Magnaporthe oryzae isolated from Bangladesh in 2016 and 2017 [Internet]. 2017. Available from: https://figshare.com/articles/dataset/Genome_assemblies_of_Magnaporthe_oryzae_isolated_from_Bangladesh_in_2016_and_2017/5236381
15	Darren Soanes, Antonio Nhani Jr, João L. Nunes Maciel, Nicholas J Talbot. Genome assemblies of Magnaporthe oryzae [Internet]. 2017. Available from: https://figshare.com/articles/dataset/Genome_assemblies_of_Magnaporthe_oryzae/5231485
16	Zhong Z, Norvienyeku J, Chen M, Bao J, Lin L, Chen L, et al. Directional Selection from Host Plants Is a Major Force Driving Host Specificity in Magnaporthe Species. Sci Rep. 2016 May 6;6(1):25591.
17	Bao J, Chen M, Zhong Z, Tang W, Lin L, Zhang X, et al. PacBio Sequencing Reveals Transposable Elements as a Key Contributor to Genomic Plasticity and Virulence Variation in Magnaporthe oryzae. Mol Plant. 2017 Nov 6;10(11):1465–8.
18	Chen C, Lian B, Hu J, Zhai H, Wang X, Venu RC, et al. Genome comparison of two Magnaporthe oryzae field isolates reveals genome variations and potential virulence effectors. BMC Genomics. 2013 Dec 16;14:887–887.
19	Inoue Y, Vy TTP, Yoshida K, Asano H, Mitsuoka C, Asuke S, et al. Evolution of the wheat blast fungus through functional losses in a host specificity determinant. Science. 2017;357(6346):80–3.
20	Gómez Luciano LB, Tsai IJ, Chuma I, Tosa Y, Chen Y-H, Li J-Y, et al. Blast Fungal Genomes Show Frequent Chromosomal Changes, Gene Gains and Losses, and Effector Gene Turnover. Mol Biol Evol. 2019 Jun 1;36(6):1148–61.
21	Xue M, Yang J, Li Z, Hu S, Yao N, Dean RA, et al. Comparative analysis of the genomes of two field isolates of the rice blast fungus Magnaporthe oryzae. PLoS Genet. 2012;8(8):e1002869.
22	Kumar A, Sheoran N, Prakash G, Ghosh A, Chikara SK, Rajashekara H, et al. Genome Sequence of a Unique Magnaporthe oryzae RMg-Dl Isolate from India That Causes Blast Disease in Diverse Cereal Crops, Obtained Using PacBio Single-Molecule and Illumina HiSeq2500 Sequencing. Genome Announc. 2017 Feb 16;5(7):e01570-16.
23	Zhu K, Bao J, Zhang L, Yang X, Li Y, Zhu M, et al. Comparative analysis of the genome of the field isolate V86010 of the rice blast fungus Magnaporthe oryzae from Philippines. J Integr Agric. 2017 Oct 1;16(10):2222–30.
