# Supplementary material for: A single amino acid polymorphism in a conserved effector of the multihost blast fungus pathogen expands host-target binding spectrum
Source: PLoS Pathog. 2021 Nov 10;17(11):e1009957. doi: 10.1371/journal.ppat.1009957 (PMC8608293; doi:10.1371/journal.ppat.1009957)
Supplement: S2 Table — (XLSX) [file ppat.1009957.s002.xlsx]

## Sheet: Gene Models APikL2 locus
Transcript	Chr	Start	End	Gene	SignalP	Uniprot	Description
BSY92_00407-RA	chr3	1275898	1278670	BSY92_00407	NO	sp|Q08905|FRE3_YEAST	Ferric reductase transmembrane component 3 OS=Saccharomyces cerevisiae
BSY92_00408-RA	chr3	1279366	1280277	BSY92_00408	NO	NA	NA
BSY92_00409-RA	chr3	1280924	1282746	BSY92_00409	NO	NA	NA
BSY92_00410-RA	chr3	1284509	1284859	BSY92_00410	NO	NA	NA
BSY92_00411-RA	chr3	1284995	1285549	BSY92_00411	YES	NA	NA
BSY92_00412-RA	chr3	1287632	1288628	BSY92_00412	NO	sp|E6Y2X0|PILR2_LINUS	Bifunctional pinoresinol-lariciresinol reductase 2 OS=Linum usitatissimum
BSY92_00413-RA	chr3	1289873	1290839	BSY92_00413	NO	sp|O13317|TRI11_FUSSP	Isotrichodermin C-15 hydroxylase OS=Fusarium sporotrichioides
BSY92_00414-RA	chr3	1291020	1292776	BSY92_00414	YES	sp|B8NM74|USTQ_ASPFN	Tyrosinase ustQ OS=Aspergillus flavus
BSY92_00415-RA	chr3	1296187	1298025	BSY92_00415	YES	sp|D4AYS6|A1345_ARTBC	Probable extracellular serine carboxypeptidase OS=Arthroderma benhamiae
BSY92_00416-RA	chr3	1302092	1303448	BSY92_00416	YES	sp|Q9US44|YIZG_SCHPO	Uncharacterized transporter C1002.16c OS=Schizosaccharomyces pombe
BSY92_00417-RA	chr3	1302725	1304746	BSY92_00417	NO	NA	NA
BSY92_00418-RA	chr3	1304980	1306558	BSY92_00418	NO	sp|Q9Y783|SODM_NEUCR	Superoxide dismutase [Mn], mitochondrial OS=Neurospora crassa
BSY92_00419-RA	chr3	1308561	1308930	BSY92_00419	NO	NA	NA
BSY92_00420-RA	chr3	1311679	1314072	BSY92_00420	YES	sp|P78722|LAC2_PODAS	Laccase-2 OS=Podospora anserina
BSY92_00421-RA	chr3	1315533	1315851	BSY92_00421	YES	NA	NA
BSY92_00422-RA	chr3	1318717	1319104	BSY92_00422	YES	NA	NA
BSY92_00423-RA	chr3	1324101	1324443	BSY92_00423	YES	NA	NA
BSY92_00424-RA	chr3	1325777	1326040	BSY92_00424	NO	NA	NA
BSY92_00425-RA	chr3	1328999	1329242	BSY92_00425	YES	NA	NA
BSY92_00426-RA	chr3	1330229	1333172	BSY92_00426	NO	sp|Q5BEJ5|AFOF_EMENI	FAD-linked oxidoreductase afoF OS=Emericella nidulans
BSY92_00427-RA	chr3	1335611	1337206	BSY92_00427	NO	sp|Q09851|AYR1_SCHPO	NADPH-dependent 1-acyldihydroxyacetone phosphate reductase OS=Schizosaccharomyces pombe
BSY92_00428-RA	chr3	1339854	1341605	BSY92_00428	YES	sp|P43485|MCRA_STRLA	Mitomycin radical oxidase OS=Streptomyces lavendulae
BSY92_00429-RA	chr3	1342349	1343637	BSY92_00429	NO	sp|O14295|PLR1_SCHPO	Pyridoxal reductase OS=Schizosaccharomyces pombe
BSY92_00430-RA	chr3	1344365	1345833	BSY92_00430	NO	sp|Q4WLD1|PYR5_ASPFU	FAD-dependent monooxygenase pyr5 OS=Neosartorya fumigata
BSY92_00431-RA	chr3	1346578	1347754	BSY92_00431	NO	sp|Q56840|HCDR_XANP2	2-(R)-hydroxypropyl-CoM dehydrogenase OS=Xanthobacter autotrophicus
BSY92_00432-RA	chr3	1347935	1348696	BSY92_00432	NO	NA	NA
BSY92_00433-RA	chr3	1349988	1351172	BSY92_00433	NO	sp|Q00674|STCE_EMENI	Putative sterigmatocystin biosynthesis ketoreductase stcE OS=Emericella nidulans
BSY92_00434-RA	chr3	1351756	1352169	BSY92_00434	YES	NA	NA
BSY92_00435-RA	chr3	1354345	1354942	BSY92_00435	NO	NA	NA
BSY92_00436-RA	chr3	1356423	1364204	BSY92_00436	NO	sp|W7MT31|FUB1_GIBM7	Reducing polyketide synthase FUB1 OS=Gibberella moniliformis
BSY92_00437-RA	chr3	1366828	1367459	BSY92_00437	NO	NA	NA
BSY92_00438-RA	chr3	1371429	1372360	BSY92_00438	YES	NA	NA

## Sheet: Gene Models APikL5 locus
Transcript	Chr	Start	End	Gene	SignalP	Uniprot	Description
BSY92_11909-RA	chr7	3808065	3808415	BSY92_11909	NO	NA	NA
BSY92_11910-RA	chr7	3818636	3820059	BSY92_11910	NO	NA	NA
BSY92_11911-RA	chr7	3823977	3825946	BSY92_11911	NO	NA	NA
BSY92_11912-RA	chr7	3831807	3832341	BSY92_11912	NO	NA	NA
BSY92_11913-RA	chr7	3834311	3834623	BSY92_11913	NO	NA	NA
BSY92_11914-RA	chr7	3835225	3835526	BSY92_11914	YES	NA	NA
BSY92_11915-RA	chr7	3840791	3841641	BSY92_11915	NO	NA	NA
BSY92_11916-RA	chr7	3843819	3844245	BSY92_11916	NO	NA	NA
BSY92_11917-RA	chr7	3846518	3846917	BSY92_11917	YES	NA	NA
BSY92_11918-RA	chr7	3855009	3855377	BSY92_11918	NO	NA	NA
BSY92_11919-RA	chr7	3856918	3857381	BSY92_11919	NO	NA	NA
BSY92_11920-RA	chr7	3860644	3863498	BSY92_11920	NO	sp|P14404|EVI1_MOUSE	MDS1 and EVI1 complex locus protein EVI1 OS=Mus musculus
BSY92_11921-RA	chr7	3869278	3869644	BSY92_11921	NO	NA	NA
BSY92_11922-RA	chr7	3870339	3871018	BSY92_11922	NO	NA	NA
BSY92_11923-RA	chr7	3871978	3873842	BSY92_11923	NO	sp|Q7RXR3|CENPA_NEUCR Histone	H3-like centromeric protein hH3v OS=Neurospora crassa
BSY92_11924-RA	chr7	3875863	3876299	BSY92_11924	YES	NA	NA
